# Supplementary material for: Population Variability Generated during Rescue Process and Passaging of Recombinant Mumps Viruses
Source: MDPI journal article supplement (doi:10.3390/v13122550), 2021-12-20
Supplement: s1 [file s1]

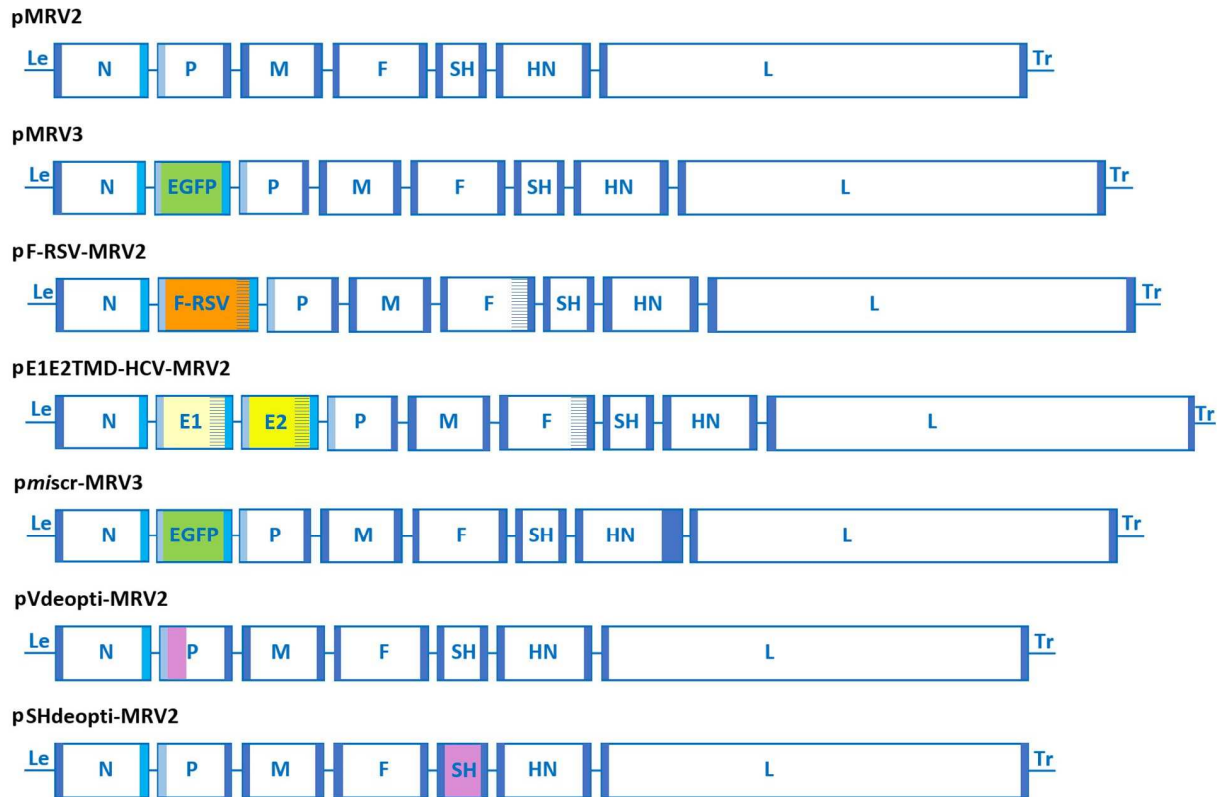

**Figure S1.** Plasmids' segments corresponding to recombinant virus antigenomes. The genomic regions in schemes are not drawn strictly to scale. Blue areas at the beginning and end of each gene indicate noncoding regions. P gene 5' noncoding region (NCR) and N gene 3' NCR are shown in different nuances in order to emphasize that they were included upstream and downstream of coding regions of additional transcription units (ATUs), respectively. In pF-RSV-MRV2 and pE1E2TMD-HCV-MRV2, striped areas indicate transmembrane and cytoplasmic region of mumps virus F glycoprotein, which was added to ectoplasmic domains of RSV F, and HCV E1 and E2 proteins. ATUs are shown in green, orange and yellow; regions with alternative synonymous sequences are shown in purple. The 3' NCR of HN gene in *pmiscr*-MRV3 is shown lengthened, to indicate addition of 84 nucleotides.

A) 408 Leu

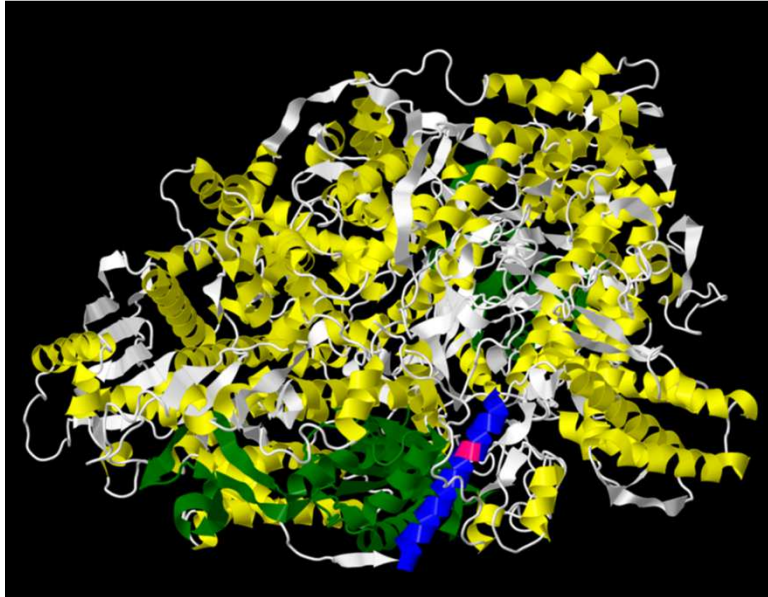

B) 408 Pro

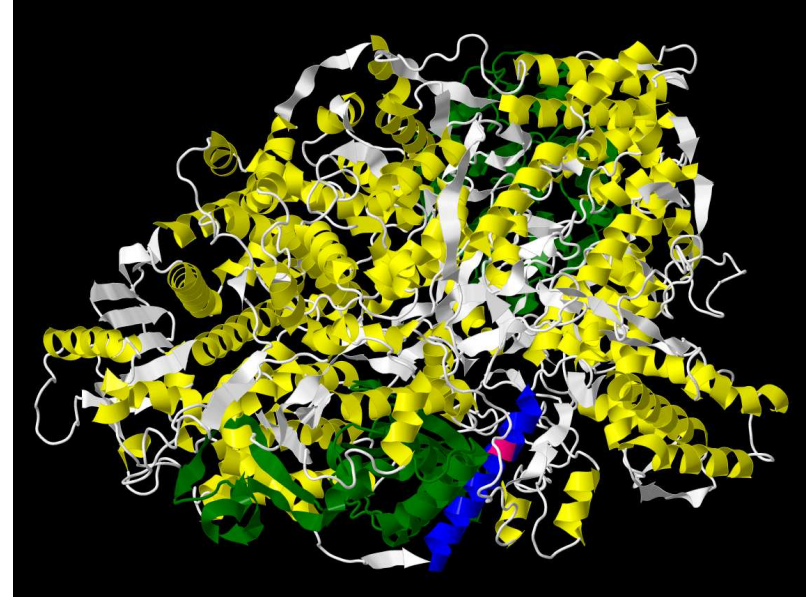

**Figure S2.** Mumps virus L protein models. The two L protein primary sequences differ only at amino acid 408 (leucine in figure A, proline in figure B). Models were generated using SWISS-MODEL homology-modelling server and visualized using Geneious Prime<sup>®</sup> 2019.2.3 software. Alpha-helix that extends from amino acid 394 to amino acid 416 is shown in blue, with amino acid 408 in red. Other  $\alpha$ -helices are shown in yellow. Green colour indicates two L protein's catalytic regions: RNA-dependent RNA-polymerase and 2'-O-methyltransferase, shown in the lower left and upper right corner, respectively. Their positions were annotated according to UniProtKB entry P30929.

**Table S1.** Enzymes and primers used in reverse transcription and PCR amplification.

| Sample                  | Reverse transcriptase | DNA polymerase | Primer pairs                                                                    |
|-------------------------|-----------------------|----------------|---------------------------------------------------------------------------------|
| <b>Plasmid sample</b>   |                       |                |                                                                                 |
| <b>pMRV2</b>            | /                     | Phusion        | N0_nextera/F2<br>M5/LZ6<br>LZ9/L12<br>MR9/L23<br>L24/L25_nextera                |
| <b>Virus sample</b>     |                       |                |                                                                                 |
| <b>MRV2</b>             | SuperScript III       | Phusion        | N0_nextera/F8<br>F15/LZ14<br>LZ13/L26<br>L9/L25_nextera                         |
| <b>MRV2-5p</b>          | SuperScript III       | Phusion        | N0_nextera/F8<br>F15/LZ14<br>LZ13/L26<br>L9/L25_nextera                         |
| <b>MRV2-10p</b>         | SuperScript III       | Phusion        | N0_nextera/F8<br>F15/LZ14<br>LZ13/L26<br>L9/L25_nextera                         |
| <b>MRV3</b>             | M-MLV                 | Velocity       | N0_nextera/M2<br>M1/LZ6<br>LZ9/L12<br>L13/L25_nextera                           |
| <b>MRV3-5p-Vero-A</b>   | M-MLV                 | Velocity       | N0_nextera/M2<br>M1/LZ6<br>LZ9/L12<br>L13/L25_nextera                           |
| <b>MRV3-10p-Vero-A</b>  | M-MLV                 | Velocity       | N0_nextera/M2<br>M1/LZ6<br>LZ9/L12<br>L13/L25_nextera                           |
| <b>MRV3-5p-Vero-B</b>   | M-MLV                 | Velocity       | N0_nextera/M2<br>M1/LZ6<br>LZ9/L12<br>L13/L25_nextera                           |
| <b>MRV3-10p-Vero-B</b>  | M-MLV                 | Velocity       | N0_nextera/M2<br>M1/LZ6<br>LZ9/L12<br>L13/L25_nextera                           |
| <b>F-RSV-MRV2</b>       | M-MLV                 | Velocity       | N0_nextera/M2<br>M1/LZ6<br>LZ9/L12<br>L13/L25_nextera                           |
| <b>F-RSV-MRV2-5p-A</b>  | M-MLV                 | Velocity       | N0_nextera/P6novi(-)<br>M1/LZ6<br>LZ9/L12<br>L13/L25_nextera                    |
| <b>F-RSV-MRV2-10p-A</b> | M-MLV                 | Velocity       | N0_nextera/M2<br>M1/LZ6<br>LZ9/L12<br>L3InFusion/L25_nextera                    |
| <b>F-RSV-MRV2-5p-B</b>  | M-MLV                 | Velocity       | N0_nextera/P6novi(-)<br>M1/LZ6<br>LZ9/L12<br>L3InFusion/L25_nextera             |
| <b>F-RSV-MRV2-10p-B</b> | M-MLV                 | Velocity       | N0_nextera/P6novi(-)<br>M1/LZ6<br>LZ9/L12<br>L3InFusion/L25_nextera             |
| <b>E1E2TMD-HCV-MRV2</b> | SuperScript III       | Phusion        | N0_nextera/P10rev<br>PstartHindIII/LZ6<br>LZ9/L12<br>MR9/L23<br>L24/L25_nextera |
| <b>mi scrMRV3</b>       | SuperScript III       | Phusion        | N0_nextera/M2<br>M1/LZ6<br>LZ9/L12<br>L13/L25_nextera<br>L3InFusion/L25_nextera |
| <b>Vdeopti-MRV2</b>     | M-MLV                 | Velocity       | N0_nextera/M2<br>M1/LZ6<br>LZ9/L12<br>L13/L25_nextera                           |
| <b>SHdeopti-MRV2</b>    | M-MLV                 | Velocity       | N0_nextera/M2<br>M1/LZ6<br>LZ9/L12<br>L13/L25_nextera                           |

**Table S2.** Sequences of primers used in PCR amplifications.

| Primer      | Sequence                                                                        |
|-------------|---------------------------------------------------------------------------------|
| N0_nextera  | TGCTGACTGCTCTGATCGTGGTAGCTGATAACCGTCAGTGTGATGTGATAGACCAAGGGGAAAAAGATGGGATATTG   |
| LZ6         | GCTCGCAATTTGTAAGTAGG                                                            |
| L25_nextera | TGGTCATAATGCTGACTGCTGTGATCGTGGTAGTAGATTAGGGTCAGTGTGATGTACCAAGGGGAGAAAGTAAATCAAT |
| M2          | CGGAGCTGGCTTGAATCAGA                                                            |
| M1          | GAATGCCAGACTCACGAGAA                                                            |
| LZ9         | TTCTCTATCGGCCATCCACT                                                            |
| L12         | GTCTCACCTCCAGTGAATACC                                                           |
| L13         | GAAGAGGAACTCGCACAGTA                                                            |
| F8          | CCAAGATCCTGTCTGGCAAT                                                            |
| L9          | AAGGCTAATGCGAAGCACTC                                                            |
| P6novi(-)   | GCCTTCTTGAGCCATGATT                                                             |
| L3InFusion  | GAACTCGCACAGTATCTATTAGATCGTGAGGTGGTC                                            |
| F15         | GTATGACGCCTGCAAGTGGTTC                                                          |
| LZ14        | AGAGGAGTTCATACGGCCAC                                                            |
| LZ13        | TTGTCTGTGCCTGGAATCAG                                                            |
| L26         | ATTCAGAGCTGTATCAAGGTCA                                                          |
| P10rev      | TTGTGGCCTTGCTTAACGAG                                                            |
| MR9         | AGAAGGAGCAAGCTTATAAA                                                            |
| L23         | CTGATGATTGGCCCTTTAGGA                                                           |
| L24         | GGACTCCAAGCACAAAGAA                                                             |
| F2          | AGCTGGTTATCAAGGATCT                                                             |
| M5          | TAGTCCATGCAGGCGGTAC                                                             |

**Table S3.** Number of reads in NGS datasets (before and after quality control (QC), mapping and filtering) and mean coverage of genomic positions.

| Sample                                     | No. of reads | No. of reads after QC | % of mapped reads | No. of reads after removal of reads with more than 2 mismatches to reference | Mean coverage | Mean coverage st. dev. |
|--------------------------------------------|--------------|-----------------------|-------------------|------------------------------------------------------------------------------|---------------|------------------------|
| <b>Plasmid (without PCR amplification)</b> |              |                       |                   |                                                                              |               |                        |
| pMRV2                                      | 6,296,782    | 4,235,264             | 80.55             | 3,340,146                                                                    | 22,580        | 3,413                  |
|                                            | 1,254,252    | 828,654               | 80.77             | 653,179                                                                      | 4,390         | 681                    |
|                                            | 1,573,924    | 1,020,314             | 80.60             | 803,204                                                                      | 5,354         | 828                    |
| pMRV3                                      | 1,007,806    | 846,414               | 81.96             | 690,167                                                                      | 4,932         | 640                    |
| pF-RSV-MRV2                                | 467,498      | 282,282               | 78.63             | 216,671                                                                      | 1,226         | 236                    |
| pE1E2TMD-HCV-MRV2                          | 735,198      | 592,176               | 82.47             | 485,533                                                                      | 3,150         | 378                    |
| p <i>mi</i> scr-MRV3                       | 564,174      | 467,978               | 82.58             | 384,411                                                                      | 2,712         | 364                    |
| pVdeopti-MRV2                              | 623,166      | 388,502               | 78.88             | 300,298                                                                      | 1,940         | 311                    |
| pSHdeopti-MRV2                             | 1,363,776    | 1,103,614             | 81.21             | 891,204                                                                      | 6,640         | 864                    |
| <b>Plasmid (PCR amplified)</b>             |              |                       |                   |                                                                              |               |                        |
| pMRV2                                      | 1,438,444    | 960,118               | 96.59             | 906,711                                                                      | 6,085         | 6,849                  |
|                                            | 1,025,268    | 678,290               | 96.68             | 640,980                                                                      | 4,285         | 4,778                  |
|                                            | 1,535,000    | 1,006,142             | 96.05             | 943,446                                                                      | 6,282         | 8,759                  |
| <b>Virus (PCR amplified)</b>               |              |                       |                   |                                                                              |               |                        |
| MRV2                                       | 482,232      | 389,916               | 98.48             | 381,766                                                                      | 2,818         | 1,239                  |
| MRV2-5p                                    | 153,258      | 122,078               | 98.71             | 119,668                                                                      | 876           | 696                    |
| MRV2-10p                                   | 470,624      | 380,568               | 98.82             | 373,647                                                                      | 2,763         | 928                    |
| MRV3                                       | 921,748      | 582,382               | 80.22             | 459,807                                                                      | 2,863         | 2,256                  |
| MRV3-5p-A                                  | 1,376,636    | 1,160,212             | 97.49             | 1,124,193                                                                    | 7,991         | 6,156                  |
| MRV3-10p-A                                 | 874,732      | 580,050               | 95.43             | 540,871                                                                      | 3,422         | 3,308                  |
| MRV3-5p-B                                  | 1,205,768    | 1,011,444             | 98.08             | 987,009                                                                      | 7,046         | 6,659                  |
| MRV3-10p-B                                 | 1,385,982    | 1,169,316             | 98.50             | 1,146,054                                                                    | 8,222         | 7,491                  |
| F-RSV-MRV2                                 | 1,084,550    | 931,740               | 96.18             | 892,550                                                                      | 6,119         | 3,768                  |
| F-RSV-MRV2-5p-A                            | 687,466      | 555,900               | 98.11             | 541,790                                                                      | 3,563         | 2,465                  |
| F-RSV-MRV2-10p-A                           | 933,032      | 772,470               | 96.84             | 743,227                                                                      | 4,962         | 3,028                  |
| F-RSV-MRV2-5p-B                            | 2,743,136    | 2,200,438             | 90.25             | 1,973,355                                                                    | 12,975        | 5,435                  |
| F-RSV-MRV2-10p-B                           | 959,368      | 795,954               | 95.33             | 754,686                                                                      | 5,070         | 1,462                  |
| E1E2TMD-HCV-MRV2                           | 832,430      | 670,134               | 97.83             | 650,854                                                                      | 4,192         | 3,678                  |
| <i>mi</i> scr-MRV3                         | 540,448      | 430,592               | 97.89             | 418,633                                                                      | 2,875         | 1,463                  |
| Vdeopti-MRV2                               | 830,512      | 536,684               | 92.45             | 487,923                                                                      | 3,212         | 1,293                  |
| SHdeopti-MRV2                              | 411,670      | 320,652               | 97.30             | 311,208                                                                      | 2,259         | 1,542                  |

**Table S4.** Positions and frequencies of nucleotide substitutions and corresponding amino acid changes in F-RSV viral rescue stocks. The substitutions indicate the difference from input plasmid sequence (the first nucleotide/amino acid is the identity in plasmid). For synonymous substitutions only the number of corresponding amino acid is shown. For MRV3, F-RSV-MRV2, E1E2TMD-HCV-MRV2 and *m1*scrMRV3 only the regions of mumps virus backbone (not the insert(s)) are included in the analysis, their genomic positions are adjusted to corresponding positions in MRV2. Substitutions present in viral population consensus sequence (present in more than 50% of reads) are indicated in bold.

|                                               | MRV2                                                                          | MRV3                                                                                                                                                                                                                                                    | F-RSV-MRV2                                                                                                                                    | E1E2TMD-HCV-MRV2                                                                                                                                        | mi scrMRV3                                                                                                      | Vdeopti-MRV2                                                                         | SHdeopti-MRV2                                                                                                                                                                                                                                                                                                                      |
|-----------------------------------------------|-------------------------------------------------------------------------------|---------------------------------------------------------------------------------------------------------------------------------------------------------------------------------------------------------------------------------------------------------|-----------------------------------------------------------------------------------------------------------------------------------------------|---------------------------------------------------------------------------------------------------------------------------------------------------------|-----------------------------------------------------------------------------------------------------------------|--------------------------------------------------------------------------------------|------------------------------------------------------------------------------------------------------------------------------------------------------------------------------------------------------------------------------------------------------------------------------------------------------------------------------------|
| total genome length (including the insert(s)) | 15384                                                                         | 16296                                                                                                                                                                                                                                                   | 17328                                                                                                                                         | 17562                                                                                                                                                   | 16380                                                                                                           | 15384                                                                                | 15384                                                                                                                                                                                                                                                                                                                              |
| no. of variable sites in MuV backbone         | 4                                                                             | 18                                                                                                                                                                                                                                                      | 14                                                                                                                                            | 9                                                                                                                                                       | 6                                                                                                               | 9                                                                                    | 13                                                                                                                                                                                                                                                                                                                                 |
| Gemomic region (length)                       |                                                                               |                                                                                                                                                                                                                                                         |                                                                                                                                               |                                                                                                                                                         |                                                                                                                 |                                                                                      |                                                                                                                                                                                                                                                                                                                                    |
| leader (55)                                   |                                                                               |                                                                                                                                                                                                                                                         |                                                                                                                                               |                                                                                                                                                         |                                                                                                                 |                                                                                      |                                                                                                                                                                                                                                                                                                                                    |
| N gene (1851)                                 |                                                                               |                                                                                                                                                                                                                                                         |                                                                                                                                               |                                                                                                                                                         |                                                                                                                 |                                                                                      |                                                                                                                                                                                                                                                                                                                                    |
| 5' noncoding region (90)                      | G131A (1.7%)                                                                  |                                                                                                                                                                                                                                                         |                                                                                                                                               |                                                                                                                                                         |                                                                                                                 |                                                                                      |                                                                                                                                                                                                                                                                                                                                    |
| coding region (1650)                          | G1683A; Arg513Gln (1.6%)                                                      | T1588C; 481 (5.5%)<br>T1615C; 490 (2.3%)                                                                                                                                                                                                                | T436G; 97 (1.0%)<br>T647C; Tyr168His (1.8%)<br><b>T1599C; Leu485Ser (80.3%)</b><br><b>T1615C; 490 (80.8%)</b>                                 |                                                                                                                                                         |                                                                                                                 |                                                                                      |                                                                                                                                                                                                                                                                                                                                    |
| 3' noncoding region (111)                     |                                                                               |                                                                                                                                                                                                                                                         | C1834T (2.8%)<br>A1902G (32.2%)                                                                                                               |                                                                                                                                                         | C1834T (1.7%)                                                                                                   |                                                                                      |                                                                                                                                                                                                                                                                                                                                    |
| intergenic region (2)                         |                                                                               |                                                                                                                                                                                                                                                         |                                                                                                                                               |                                                                                                                                                         |                                                                                                                 |                                                                                      |                                                                                                                                                                                                                                                                                                                                    |
| P gene (1318)                                 |                                                                               |                                                                                                                                                                                                                                                         |                                                                                                                                               |                                                                                                                                                         |                                                                                                                 |                                                                                      |                                                                                                                                                                                                                                                                                                                                    |
| 5' noncoding region (70)                      | T1961G (3.3%)                                                                 |                                                                                                                                                                                                                                                         |                                                                                                                                               |                                                                                                                                                         |                                                                                                                 |                                                                                      |                                                                                                                                                                                                                                                                                                                                    |
| P coding region (1174)                        |                                                                               |                                                                                                                                                                                                                                                         |                                                                                                                                               |                                                                                                                                                         |                                                                                                                 |                                                                                      |                                                                                                                                                                                                                                                                                                                                    |
| V coding region (675)                         | C2627T; Leu97Phe (1.0%)<br>A2139C; Gln54Pro (1.6%)<br>G2085A; Ser36Asn (8.2%) |                                                                                                                                                                                                                                                         |                                                                                                                                               |                                                                                                                                                         |                                                                                                                 |                                                                                      |                                                                                                                                                                                                                                                                                                                                    |
| I coding region (512)                         | C2627T; Leu97Phe (1.0%)<br>A2139C; Gln54Pro (1.6%)<br>G2085A; Ser36Asn (8.2%) |                                                                                                                                                                                                                                                         |                                                                                                                                               |                                                                                                                                                         |                                                                                                                 |                                                                                      |                                                                                                                                                                                                                                                                                                                                    |
| 3' noncoding region (74)                      | T3220A (1.0%)                                                                 |                                                                                                                                                                                                                                                         |                                                                                                                                               |                                                                                                                                                         |                                                                                                                 |                                                                                      |                                                                                                                                                                                                                                                                                                                                    |
| intergenic region (1)                         |                                                                               |                                                                                                                                                                                                                                                         |                                                                                                                                               |                                                                                                                                                         |                                                                                                                 |                                                                                      |                                                                                                                                                                                                                                                                                                                                    |
| M gene (1254)                                 |                                                                               |                                                                                                                                                                                                                                                         |                                                                                                                                               |                                                                                                                                                         |                                                                                                                 |                                                                                      |                                                                                                                                                                                                                                                                                                                                    |
| 5' noncoding region (36)                      |                                                                               |                                                                                                                                                                                                                                                         |                                                                                                                                               |                                                                                                                                                         |                                                                                                                 |                                                                                      |                                                                                                                                                                                                                                                                                                                                    |
| coding region (1128)                          |                                                                               | C3902A; Cys213stop (1.1%)<br>A4282G; Lys340Arg (2.8%)                                                                                                                                                                                                   | G4051A; Arg263His (4.8%)                                                                                                                      |                                                                                                                                                         |                                                                                                                 | A3396T; Ile45Leu (1.0%)<br>C3902A; Cys213stop (1.0%)                                 |                                                                                                                                                                                                                                                                                                                                    |
| 3' noncoding region (90)                      |                                                                               |                                                                                                                                                                                                                                                         |                                                                                                                                               |                                                                                                                                                         |                                                                                                                 |                                                                                      |                                                                                                                                                                                                                                                                                                                                    |
| F gene (1729)                                 |                                                                               |                                                                                                                                                                                                                                                         |                                                                                                                                               |                                                                                                                                                         |                                                                                                                 |                                                                                      |                                                                                                                                                                                                                                                                                                                                    |
| 5' noncoding region (64)                      |                                                                               |                                                                                                                                                                                                                                                         |                                                                                                                                               |                                                                                                                                                         |                                                                                                                 |                                                                                      |                                                                                                                                                                                                                                                                                                                                    |
| coding region (1617)                          | T4681G; Leu25Val (2.4%)                                                       |                                                                                                                                                                                                                                                         |                                                                                                                                               | C5814T; 423 (11.0%)                                                                                                                                     |                                                                                                                 | A5068G; Ile175Val (16.4%)                                                            |                                                                                                                                                                                                                                                                                                                                    |
| 3' noncoding region (48)                      |                                                                               |                                                                                                                                                                                                                                                         |                                                                                                                                               |                                                                                                                                                         |                                                                                                                 |                                                                                      |                                                                                                                                                                                                                                                                                                                                    |
| intergenic region (7)                         |                                                                               |                                                                                                                                                                                                                                                         |                                                                                                                                               |                                                                                                                                                         |                                                                                                                 |                                                                                      |                                                                                                                                                                                                                                                                                                                                    |
| SH gene (316)                                 |                                                                               |                                                                                                                                                                                                                                                         |                                                                                                                                               |                                                                                                                                                         |                                                                                                                 |                                                                                      |                                                                                                                                                                                                                                                                                                                                    |
| 5' noncoding region (50)                      |                                                                               |                                                                                                                                                                                                                                                         |                                                                                                                                               |                                                                                                                                                         |                                                                                                                 |                                                                                      |                                                                                                                                                                                                                                                                                                                                    |
| coding region (174)                           | A6354G; Ile29Met (1.1%)                                                       |                                                                                                                                                                                                                                                         |                                                                                                                                               |                                                                                                                                                         |                                                                                                                 |                                                                                      |                                                                                                                                                                                                                                                                                                                                    |
| 3' noncoding region (92)                      |                                                                               |                                                                                                                                                                                                                                                         |                                                                                                                                               |                                                                                                                                                         |                                                                                                                 |                                                                                      |                                                                                                                                                                                                                                                                                                                                    |
| intergenic region (2)                         |                                                                               |                                                                                                                                                                                                                                                         |                                                                                                                                               |                                                                                                                                                         |                                                                                                                 |                                                                                      |                                                                                                                                                                                                                                                                                                                                    |
| HN gene (1893)                                |                                                                               |                                                                                                                                                                                                                                                         |                                                                                                                                               |                                                                                                                                                         |                                                                                                                 |                                                                                      |                                                                                                                                                                                                                                                                                                                                    |
| 5' noncoding region (78)                      |                                                                               |                                                                                                                                                                                                                                                         |                                                                                                                                               |                                                                                                                                                         |                                                                                                                 |                                                                                      |                                                                                                                                                                                                                                                                                                                                    |
| coding region (1749)                          |                                                                               | T7593C; Leu327Ser (1.1%)<br>G7692A; Arg360His (1.9%)<br>A8154G; Asn514Ser (2.2%)                                                                                                                                                                        | A6829C; 72 (8.1%)                                                                                                                             | T6870C; Val86Ala (1.7%)                                                                                                                                 |                                                                                                                 | T8222C; Phe537Leu (3.7%)                                                             |                                                                                                                                                                                                                                                                                                                                    |
| 3' noncoding region (66)                      | G8422A (1.1%)<br>T8419C (2.5%)                                                |                                                                                                                                                                                                                                                         |                                                                                                                                               |                                                                                                                                                         |                                                                                                                 |                                                                                      |                                                                                                                                                                                                                                                                                                                                    |
| intergenic region (1)                         |                                                                               |                                                                                                                                                                                                                                                         |                                                                                                                                               |                                                                                                                                                         |                                                                                                                 |                                                                                      |                                                                                                                                                                                                                                                                                                                                    |
| L gene (6931)                                 |                                                                               |                                                                                                                                                                                                                                                         |                                                                                                                                               |                                                                                                                                                         |                                                                                                                 |                                                                                      |                                                                                                                                                                                                                                                                                                                                    |
| 5' noncoding region (8)                       |                                                                               |                                                                                                                                                                                                                                                         |                                                                                                                                               |                                                                                                                                                         |                                                                                                                 |                                                                                      |                                                                                                                                                                                                                                                                                                                                    |
| coding region (6786)                          | C9660T; Pro408Leu (35.7%)                                                     | A8569G; 44 (3.7%)<br>A8920T; 161 (1.8%)<br><b>C9660T; Pro408Leu (74.6%)</b><br>A10589C; Asn718His (1.8%)<br>T10646C; Phe737Leu (3.5%)<br>C11538T; Pro1034Leu (1.7%)<br>T11780A; Leu1115Met (1.6%)<br>G12758A; Glu1441Lys (2.3%)<br>G14191A; 1918 (3.6%) | G8603T; Glu56stop (38.6%)<br>T8815A; Asp126Glu (3.8%)<br>C9659T; Pro408Ser (6.6%)<br><b>C9660T; Pro408Leu (93.2%)</b><br>C13924A; 1829 (1.1%) | <b>C8447C; Leu4Ile (89.3%)</b><br>G8959T; Glu174Asp (2.0%)<br>C9566T; Gln377stop (4.1%)<br><b>C9660T; Pro408Leu (100%)</b><br>T11274A; Leu946Gln (4.0%) | C8678T; Arg81Cys (1.3%)<br>C9660T; Pro408Leu (37.7%)<br>T11379C; Ile981Thr (1.3%)<br>G12758A; Glu1441Lys (1.2%) | C9660T; Pro408Leu (9.8%)<br>G12758A; Glu1441Lys (2.6%)<br>A13251G; Gln1605Arg (1.1%) | T8624G; Leu63Val (3.2%)<br>A8786G; Thr117Ala (1.2%)<br><b>C9660T; Pro408Leu (85.8%)</b><br>G9905A; Gly490Arg (2.5%)<br>C9998A; Leu521Ile (4.2%)<br>T11235G; Ile933Ser (1.9%)<br>G11782T; Leu1115Phe (1.4%)<br>T11797A; Asn1120Lys (1.2%)<br>T11936A; Leu1167Ile (2.0%)<br>T14354A; Phe1973Ile (3.2%)<br>T14562G; Ile2042Ser (3.3%) |
| 3' noncoding region (137)                     |                                                                               |                                                                                                                                                                                                                                                         |                                                                                                                                               |                                                                                                                                                         |                                                                                                                 |                                                                                      |                                                                                                                                                                                                                                                                                                                                    |
| trailer (24)                                  |                                                                               |                                                                                                                                                                                                                                                         |                                                                                                                                               |                                                                                                                                                         |                                                                                                                 |                                                                                      |                                                                                                                                                                                                                                                                                                                                    |

**Table S5.** Positions and frequencies of variable sites in added genomic segments (ATUs) in primary rescue stocks of MRV3, F-RSV-MRV2, *mi scrMRV3* and E1E2TMD-HCV-MRV2. The nucleotide and amino acid changes are indicated. For synonymous substitutions only the number of corresponding amino acid is shown. Substitution present in the viral population consensus sequence (present in more than 50% of reads) is indicated in bold.

|                                                                                                                  | MRV3                     | F-RSV-MRV2                                                                                                                                                      | E1E2TMD-HCV-MRV2 | <i>mi scrMRV3</i> |
|------------------------------------------------------------------------------------------------------------------|--------------------------|-----------------------------------------------------------------------------------------------------------------------------------------------------------------|------------------|-------------------|
| insert length                                                                                                    | 912                      | 1944                                                                                                                                                            | 2178             | 996               |
| no. of variable sites                                                                                            | 2                        | 7                                                                                                                                                               | 1                | 0                 |
| region (length)                                                                                                  |                          |                                                                                                                                                                 |                  |                   |
| insert 1                                                                                                         |                          |                                                                                                                                                                 |                  |                   |
| ATU1                                                                                                             |                          |                                                                                                                                                                 |                  |                   |
| 5' noncoding region (70)                                                                                         | T1952C (1.4%)            | none                                                                                                                                                            | none             | none              |
| coding region<br>(720 for MRV3 and <i>mi scrMRV3</i> ,<br>1758 for F-RSV-MRV2,<br>645 for E1E2TMD-HCV-MRV2)      | G2507A; Val177Met (1.1%) | A2251G; 91 (1.1%)<br>A2673G; Glu232Gly (1.0%)<br>T2720C; Ser248Pro (1.3%)<br>C3016T; 346 (2.5%)<br><b>A3551G; Ile525Val (79.0%)</b><br>G3581A; Val535Met (1.0%) | none             | none              |
| 3' noncoding region<br>(120 for MRV3 and <i>mi scrMRV3</i> ,<br>114 for F-RSV-MRV2,<br>111 for E1E2TMD-HCV-MRV2) | none                     | A3846G (1.2%)                                                                                                                                                   | none             | none              |
| intergenic region ATU1-ATU2 (2)                                                                                  | n/a                      | n/a                                                                                                                                                             | none             | n/a               |
| ATU2                                                                                                             |                          |                                                                                                                                                                 |                  |                   |
| 5' noncoding region (70)                                                                                         | n/a                      | n/a                                                                                                                                                             | T2751C (4.1%)    | n/a               |
| coding region (1167)                                                                                             | n/a                      | n/a                                                                                                                                                             | none             | n/a               |
| 3' noncoding region (111)                                                                                        | n/a                      | n/a                                                                                                                                                             | none             | n/a               |
| intergenic region insert 1-P gene (2)                                                                            | none                     | none                                                                                                                                                            | none             | none              |
| insert 2                                                                                                         |                          |                                                                                                                                                                 |                  |                   |
| 3' HN noncoding region (84)                                                                                      | n/a                      | n/a                                                                                                                                                             | n/a              | none              |

n/a, not applicable

**Table S6.** Variants detected during passaging of MRV2, MRV3 and F-RSV-MRV2. As references, input plasmid sequences were used.

| viral sample     | genomic position | genomic region    | viral variant | plasmid | viral variant percentage |
|------------------|------------------|-------------------|---------------|---------|--------------------------|
| <b>MRV2</b>      | 1683             | N gene; CR        | A             | G       | 1.625                    |
|                  | 4618             | F gene; CR        | G             | T       | 2.434                    |
|                  | 6354             | SH gene; CR       | G             | A       | 1.125                    |
|                  | 9660             | L gene; CR        | T             | C       | 35.66                    |
| <b>MRV2-5p</b>   | 577              | N gene; CR        | G             | A       | 1.296                    |
|                  | 860              | N gene; CR        | G             | T       | 1.733                    |
|                  | 1793             | N gene; CR        | C             | T       | 6.583                    |
|                  | 2728             | P gene; CR        | G             | A       | 3.135                    |
|                  | 5024             | F gene; CR        | G             | A       | 1.258                    |
|                  | 6354             | SH gene; CR       | G             | A       | 1.230                    |
|                  | 6527             | SH gene; 3' NCR   | A             | G       | 1.603                    |
|                  | 8261             | HN gene; CR       | A             | G       | 5.417                    |
|                  | 9660             | L gene; CR        | T             | C       | 74.66                    |
|                  | 11274            | L gene; CR        | A             | T       | 1.149                    |
|                  | 11657            | L gene; CR        | G             | A       | 1.022                    |
|                  | 13374            | L gene; CR        | C             | A       | 4.612                    |
|                  | 14324            | L gene; CR        | C             | T       | 1.156                    |
| <b>MRV2-10p</b>  | 1793             | N gene; CR        | C             | T       | 26.76                    |
|                  | 2349             | P gene; CR        | T             | G       | 1.457                    |
|                  | 2728             | P gene; CR        | G             | A       | 1.267                    |
|                  | 3220             | P gene; 3' NCR    | A             | T       | 1.008                    |
|                  | 7101             | HN gene; CR       | C             | T       | 1.257                    |
|                  | 8261             | HN gene; CR       | A             | G       | 78.66                    |
|                  | 9660             | L gene; CR        | T             | C       | 100                      |
|                  | 12254            | L gene; CR        | T             | G       | 1.002                    |
|                  | 13374            | L gene; CR        | C             | A       | 79.43                    |
|                  | 14864            | L gene; CR        | G             | A       | 1.047                    |
| <b>MRV3</b>      | 131              | N gene; 5' NCR    | A             | G       | 1.724                    |
|                  | 1588             | N gene; CR        | C             | T       | 5.466                    |
|                  | 1615             | N gene; CR        | C             | T       | 2.314                    |
|                  | 1952             | EGFP gene; 5' NCR | C             | T       | 1.358                    |
|                  | 2507             | EGFP gene; CR     | A             | G       | 1.138                    |
|                  | 4814             | M gene; CR        | A             | C       | 1.122                    |
|                  | 5194             | M gene; CR        | G             | A       | 2.757                    |
|                  | 8505             | HN gene; CR       | C             | T       | 1.137                    |
|                  | 8604             | HN gene; CR       | A             | G       | 1.922                    |
|                  | 9066             | HN gene; CR       | G             | A       | 2.203                    |
|                  | 9334             | HN gene; 3' NCR   | A             | G       | 1.062                    |
|                  | 9481             | L gene; CR        | G             | A       | 3.726                    |
|                  | 9832             | L gene; CR        | T             | A       | 1.829                    |
|                  | 10572            | L gene; CR        | T             | C       | 74.62                    |
|                  | 11501            | L gene; CR        | C             | A       | 1.845                    |
|                  | 11558            | L gene; CR        | C             | T       | 3.,483                   |
|                  | 12450            | L gene; CR        | T             | C       | 1.744                    |
|                  | 12692            | L gene; CR        | A             | T       | 1.567                    |
|                  | 13670            | L gene; CR        | A             | G       | 2.251                    |
|                  | 15103            | L gene; CR        | A             | G       | 3.562                    |
| <b>MRV3-5p-A</b> | 135              | N gene; 5' NCR    | T             | C       | 2.649                    |
|                  | 1588             | N gene; CR        | C             | T       | 93.8                     |
|                  | 1599             | N gene; CR        | C             | T       | 93.19                    |
|                  | 1601             | N gene; CR        | C             | T       | 52.000                   |



|            |       |                 |   |   |        |
|------------|-------|-----------------|---|---|--------|
|            | 1615  | N gene; CR      | C | T | 91.2   |
|            | 3274  | P gene; CR      | C | T | 17.89  |
|            | 3305  | P gene; CR      | C | T | 17.75  |
|            | 3494  | P gene; CR      | C | T | 19.110 |
|            | 3587  | P gene; CR      | C | A | 14.500 |
|            | 3598  | P gene; CR      | G | A | 1.856  |
|            | 3735  | P gene; CR      | A | G | 1.540  |
|            | 3750  | P gene; CR      | A | G | 2.083  |
|            | 5424  | F gene; 5' NCR  | G | T | 3.577  |
|            | 6514  | F gene; CR      | C | A | 5.024  |
|            | 8144  | HN gene; CR     | C | T | 17.94  |
|            | 8181  | HN gene; CR     | G | A | 6.163  |
|            | 8196  | HN gene; CR     | G | A | 1.601  |
|            | 8226  | HN gene; CR     | T | A | 2.832  |
|            | 8506  | HN gene; CR     | A | G | 3.898  |
|            | 8561  | HN gene; CR     | T | C | 1.572  |
|            | 8565  | HN gene; CR     | T | A | 56.17  |
|            | 9220  | HN gene; CR     | G | T | 1.201  |
|            | 10572 | L gene; CR      | T | C | 100    |
|            | 11475 | L gene; CR      | A | G | 1.020  |
|            | 11525 | L gene; CR      | T | C | 3.554  |
|            | 11546 | L gene; CR      | C | A | 2.087  |
|            | 12047 | L gene; CR      | G | T | 57.67  |
|            | 13551 | L gene; CR      | C | T | 1.246  |
|            | 14177 | L gene; CR      | A | G | 2.392  |
|            | 15658 | L gene; CR      | G | A | 1.479  |
| MRV3-10p-A | 409   | N gene; CR      | C | T | 17.68  |
|            | 1588  | N gene; CR      | C | T | 44.29  |
|            | 1599  | N gene; CR      | C | T | 21.88  |
|            | 1615  | N gene; CR      | C | T | 43.98  |
|            | 2476  | EGFP gene; CR   | T | C | 17.300 |
|            | 3090  | P gene; CR      | T | C | 1.249  |
|            | 3116  | P gene; CR      | A | G | 1.221  |
|            | 3748  | P gene; CR      | G | A | 31.78  |
|            | 4252  | M gene; CR      | C | T | 14.26  |
|            | 4305  | M gene; CR      | G | A | 1.016  |
|            | 4497  | M gene; CR      | T | G | 1.871  |
|            | 7422  | SH gene; 3' NCR | T | C | 2.116  |
|            | 7484  | HN gene; 5' NCR | G | A | 1.107  |
|            | 7568  | HN gene; CR     | C | T | 3.757  |
|            | 7810  | HN gene; CR     | G | A | 1.202  |
|            | 7949  | HN gene; CR     | C | A | 1.420  |
|            | 8181  | HN gene; CR     | G | A | 4.386  |
|            | 8196  | HN gene; CR     | C | A | 19.43  |
|            | 8232  | HN gene; CR     | A | G | 20.46  |
|            | 8570  | HN gene; CR     | T | C | 2.245  |
|            | 9089  | HN gene; CR     | A | C | 20.39  |
|            | 9467  | L gene; CR      | A | G | 16.85  |
|            | 10080 | L gene; CR      | T | C | 13.25  |
|            | 10309 | L gene; CR      | G | A | 22.070 |
|            | 10572 | L gene; CR      | T | C | 100    |
|            | 11425 | L gene; CR      | T | G | 22.040 |
|            | 12477 | L gene; CR      | T | A | 1.928  |
|            | 12924 | L gene; CR      | T | G | 16.19  |
|            | 13449 | L gene; CR      | T | A | 1.027  |

|                   |       |                   |   |   |        |
|-------------------|-------|-------------------|---|---|--------|
|                   | 14480 | L gene; CR        | G | A | 15.81  |
|                   | 15915 | L gene; CR        | T | G | 8.645  |
|                   | 16182 | L gene; 3' NCR    | T | C | 1.563  |
|                   | 16183 | L gene; 3' NCR    | G | A | 1.659  |
| <b>MRV3-5p-B</b>  | 409   | N gene; CR        | C | T | 1.203  |
|                   | 1401  | N gene; CR        | A | C | 1.132  |
|                   | 1588  | N gene; CR        | C | T | 61.83  |
|                   | 1599  | N gene; CR        | C | T | 43.24  |
|                   | 1601  | N gene; CR        | C | T | 4.688  |
|                   | 1615  | N gene; CR        | C | T | 55.99  |
|                   | 1952  | EGFP gene; 5' NCR | C | T | 2.514  |
|                   | 2476  | EGFP gene; CR     | T | C | 2.199  |
|                   | 3748  | P gene; CR        | G | A | 23.24  |
|                   | 4814  | M gene; CR        | A | C | 1.171  |
|                   | 7422  | SH gene; 3' NCR   | T | C | 2.039  |
|                   | 7439  | SH gene; 3' NCR   | A | G | 1.257  |
|                   | 7805  | HN gene; CR       | T | C | 1.788  |
|                   | 7985  | HN gene; CR       | C | A | 1.463  |
|                   | 8196  | HN gene; CR       | C | A | 2.124  |
|                   | 8232  | HN gene; CR       | A | G | 6.290  |
|                   | 9224  | HN gene; CR       | A | G | 1.458  |
|                   | 9467  | L gene; CR        | A | G | 5.759  |
|                   | 9840  | L gene; CR        | T | G | 1.319  |
|                   | 10080 | L gene; CR        | T | C | 16.800 |
|                   | 10309 | L gene; CR        | G | A | 2.820  |
|                   | 10572 | L gene; CR        | T | C | 100    |
|                   | 10809 | L gene; CR        | G | A | 2.799  |
|                   | 11425 | L gene; CR        | T | G | 33.61  |
|                   | 11558 | L gene; CR        | C | T | 1.914  |
|                   | 12261 | L gene; CR        | C | A | 1.354  |
|                   | 12924 | L gene; CR        | T | G | 5.548  |
|                   | 13449 | L gene; CR        | T | A | 1.834  |
|                   | 14480 | L gene; CR        | G | A | 6.567  |
|                   | 15915 | L gene; CR        | T | G | 14.54  |
| <b>MRV3-10p-B</b> | 135   | N gene; 5' NCR    | T | C | 2.564  |
|                   | 1588  | N gene; CR        | C | T | 100    |
|                   | 1599  | N gene; CR        | C | T | 100    |
|                   | 1615  | N gene; CR        | C | T | 92.96  |
|                   | 3274  | P gene; CR        | C | T | 1.580  |
|                   | 3305  | P gene; CR        | C | T | 1.453  |
|                   | 3312  | P gene; CR        | G | A | 1.035  |
|                   | 3735  | P gene; CR        | A | G | 2.322  |
|                   | 3750  | P gene; CR        | A | G | 2.091  |
|                   | 4814  | M gene; CR        | A | C | 1.181  |
|                   | 5424  | F gene; 5' NCR    | G | T | 5.667  |
|                   | 6326  | F gene; CR        | G | A | 1.059  |
|                   | 6514  | F gene; CR        | C | A | 1.904  |
|                   | 8144  | HN gene; CR       | C | T | 1.460  |
|                   | 8181  | HN gene; CR       | G | A | 2.204  |
|                   | 8181  | HN gene; CR       | T | A | 1.440  |
|                   | 8196  | HN gene; CR       | G | A | 1.425  |
|                   | 8226  | HN gene; CR       | T | A | 2.196  |
|                   | 8324  | HN gene; CR       | A | G | 3.725  |
|                   | 8506  | HN gene; CR       | A | G | 2.240  |
|                   | 8516  | HN gene; CR       | G | A | 8.016  |

|                        |       |                    |   |   |        |
|------------------------|-------|--------------------|---|---|--------|
|                        | 8565  | HN gene; CR        | T | A | 89.14  |
|                        | 9182  | HN gene; CR        | G | A | 23.33  |
|                        | 9184  | HN gene; CR        | G | T | 3.184  |
|                        | 9220  | HN gene; CR        | G | T | 1.583  |
|                        | 10572 | L gene; CR         | T | C | 100    |
|                        | 11525 | L gene; CR         | T | C | 2.002  |
|                        | 12047 | L gene; CR         | G | T | 89.33  |
|                        | 13204 | L gene; CR         | G | A | 4.458  |
|                        | 13670 | L gene; CR         | A | G | 1.022  |
|                        | 14177 | L gene; CR         | A | G | 1.141  |
|                        | 14767 | L gene; CR         | C | T | 3.391  |
|                        | 15658 | L gene; CR         | G | A | 1.032  |
| <b>F-RSV-MRV2</b>      | 436   | N gene; CR         | G | T | 1.042  |
|                        | 647   | N gene; CR         | C | T | 1.772  |
|                        | 1599  | N gene; CR         | C | T | 80.31  |
|                        | 1615  | N gene; CR         | C | T | 80.77  |
|                        | 1834  | N gene; 3' NCR     | T | C | 28.149 |
|                        | 1902  | N gene; 3' NCR     | G | A | 32.200 |
|                        | 2251  | F-RSV gene; CR     | G | A | 1.066  |
|                        | 2673  | F-RSV gene; CR     | G | A | 1.044  |
|                        | 2720  | F-RSV gene; CR     | C | T | 1.335  |
|                        | 3016  | F-RSV gene; CR     | T | C | 2.500  |
|                        | 3551  | F-RSV gene; CR     | G | A | 79.02  |
|                        | 3581  | F-RSV gene; CR     | A | G | 1.023  |
|                        | 3846  | F-RSV gene; 3' NCR | G | A | 1.174  |
|                        | 3905  | P gene; 5' NCR     | G | T | 3.336  |
|                        | 5995  | M gene; CR         | A | G | 4.780  |
|                        | 8773  | HN gene; CR        | C | A | 8.062  |
|                        | 10547 | L gene; CR         | T | G | 38.61  |
|                        | 10759 | L gene; CR         | A | T | 3.774  |
|                        | 11603 | L gene; CR         | T | C | 6.609  |
|                        | 11604 | L gene; CR         | T | C | 93.22  |
|                        | 15868 | L gene; CR         | A | C | 1.095  |
| <b>F-RSV-MRV2-5p-A</b> | 436   | N gene; CR         | G | T | 5.978  |
|                        | 1590  | N gene; CR         | C | T | 13.55  |
|                        | 1599  | N gene; CR         | C | T | 74.38  |
|                        | 1615  | N gene; CR         | C | T | 69.85  |
|                        | 2066  | F-RSV gene; CR     | T | G | 41.99  |
|                        | 3551  | F-RSV gene; CR     | G | A | 78.77  |
|                        | 3905  | P gene; 5' NCR     | G | T | 5.442  |
|                        | 4062  | P gene; CR         | C | T | 3.409  |
|                        | 5008  | P gene; CR         | G | A | 8.969  |
|                        | 5846  | M gene; CR         | A | C | 1.127  |
|                        | 5995  | M gene; CR         | A | G | 18.54  |
|                        | 6391  | M gene; 3' NCR     | A | G | 4.647  |
|                        | 7273  | F gene; CR         | A | G | 1.185  |
|                        | 7855  | F gene; CR         | A | G | 1.281  |
|                        | 8773  | HN gene; CR        | C | A | 3.360  |
|                        | 8795  | HN gene; CR        | G | A | 3.790  |
|                        | 9152  | HN gene; CR        | G | A | 1.007  |
|                        | 10206 | HN gene; CR        | A | G | 1.993  |
|                        | 10547 | L gene; CR         | T | G | 18.100 |
|                        | 10759 | L gene; CR         | A | T | 17.76  |
|                        | 11153 | L gene; CR         | G | A | 1.023  |
|                        | 11603 | L gene; CR         | T | C | 5.595  |

|                         |       |                |   |   |        |
|-------------------------|-------|----------------|---|---|--------|
|                         | 11604 | L gene; CR     | T | C | 94.41  |
|                         | 11947 | L gene; CR     | T | G | 1.950  |
|                         | 12161 | L gene; CR     | A | G | 1.069  |
|                         | 12475 | L gene; CR     | A | G | 1.461  |
|                         | 12584 | L gene; CR     | A | G | 40.79  |
|                         | 13218 | L gene; CR     | A | T | 2.311  |
|                         | 16379 | L gene; CR     | A | G | 4.608  |
| <b>F-RSV-MRV2-10p-A</b> | 46    | leader         | G | A | 25.38  |
|                         | 870   | N gene; CR     | A | G | 2.153  |
|                         | 1590  | N gene; CR     | C | T | 2.195  |
|                         | 1599  | N gene; CR     | C | T | 89.27  |
|                         | 1615  | N gene; CR     | C | T | 89.6   |
|                         | 1655  | N gene; CR     | C | G | 1.088  |
|                         | 1793  | N gene; CR     | C | T | 3.033  |
|                         | 1834  | N gene; 3' NCR | T | C | 1.774  |
|                         | 1902  | N gene; 3' NCR | G | A | 3.822  |
|                         | 1979  | F-RSV gene; CR | G | A | 1.407  |
|                         | 2066  | F-RSV gene; CR | T | G | 87.86  |
|                         | 2225  | F-RSV gene; CR | T | C | 1.225  |
|                         | 3264  | F-RSV gene; CR | A | G | 1.821  |
|                         | 3551  | F-RSV gene; CR | G | A | 93.74  |
|                         | 3874  | P gene; 5' NCR | C | T | 2.483  |
|                         | 4339  | P gene; CR     | C | T | 1.100  |
|                         | 4342  | P gene; CR     | A | T | 1.041  |
|                         | 4360  | P gene; CR     | G | A | 1.356  |
|                         | 4750  | P gene; CR     | G | A | 1.366  |
|                         | 5846  | M gene; CR     | A | C | 1.129  |
|                         | 5995  | M gene; CR     | A | G | 2.534  |
|                         | 6140  | M gene; CR     | A | G | 1.018  |
|                         | 8773  | HN gene; CR    | C | A | 1.385  |
|                         | 8795  | HN gene; CR    | G | A | 4.153  |
|                         | 9152  | HN gene; CR    | G | A | 69.01  |
|                         | 10206 | HN gene; CR    | A | G | 1.593  |
|                         | 10759 | L gene; CR     | A | T | 1.763  |
|                         | 10777 | L gene; CR     | T | A | 4.098  |
|                         | 11604 | L gene; CR     | T | C | 100    |
|                         | 12475 | L gene; CR     | A | G | 1.248  |
|                         | 12546 | L gene; CR     | G | A | 1.196  |
|                         | 12584 | L gene; CR     | A | G | 94.29  |
|                         | 13340 | L gene; CR     | C | A | 1.744  |
|                         | 13693 | L gene; CR     | A | G | 5.570  |
|                         | 14869 | L gene; CR     | T | C | 4.497  |
| <b>F-RSV-MRV2-5p-B</b>  | 647   | N gene; CR     | C | T | 1.013  |
|                         | 1599  | N gene; CR     | C | T | 88.12  |
|                         | 1615  | N gene; CR     | C | T | 100    |
|                         | 1902  | N gene; 3' NCR | G | A | 61.69  |
|                         | 3551  | F-RSV gene; CR | G | A | 87.48  |
|                         | 3905  | P gene; 5' NCR | G | T | 6.112  |
|                         | 4040  | P gene; CR     | C | A | 1.251  |
|                         | 4798  | P gene; CR     | C | T | 1.083  |
|                         | 5445  | M gene; CR     | A | C | 4.015  |
|                         | 5567  | M gene; CR     | A | G | 23.060 |
|                         | 5846  | M gene; CR     | A | C | 1.707  |
|                         | 5995  | M gene; CR     | A | G | 2.044  |
|                         | 7093  | F gene; CR     | A | G | 1.004  |

|                  |       |                    |   |   |       |
|------------------|-------|--------------------|---|---|-------|
|                  | 8773  | HN gene; CR        | C | A | 3.319 |
|                  | 9052  | HN gene; CR        | A | G | 1.127 |
|                  | 9228  | HN gene; CR        | G | A | 1.146 |
|                  | 9749  | HN gene; CR        | G | T | 2.521 |
|                  | 10051 | HN gene; CR        | G | T | 1.073 |
|                  | 10106 | HN gene; CR        | T | C | 2.060 |
|                  | 10330 | HN gene; 3' NCR    | T | C | 1.828 |
|                  | 10547 | L gene; CR         | T | G | 7.247 |
|                  | 10759 | L gene; CR         | A | T | 1.872 |
|                  | 11229 | L gene; CR         | A | T | 1.275 |
|                  | 11603 | L gene; CR         | T | C | 5.259 |
|                  | 11604 | L gene; CR         | T | C | 94.66 |
|                  | 11757 | L gene; CR         | T | G | 1.187 |
|                  | 11960 | L gene; CR         | T | G | 2.972 |
|                  | 12858 | L gene; CR         | C | A | 2.921 |
|                  | 13218 | L gene; CR         | A | T | 1.137 |
|                  | 13739 | L gene; CR         | G | A | 63.71 |
|                  | 13845 | L gene; CR         | T | G | 1.645 |
|                  | 15360 | L gene; CR         | T | A | 1.304 |
| F-RSV-MRV2-10p-B | 82    | N gene; 5' NCR     | C | T | 1.187 |
|                  | 647   | N gene; CR         | C | T | 3.438 |
|                  | 1599  | N gene; CR         | C | T | 98.28 |
|                  | 1615  | N gene; CR         | C | T | 98.14 |
|                  | 1902  | N gene; 3' NCR     | G | A | 92.4  |
|                  | 1905  | N gene; 3' NCR     | G | A | 3.083 |
|                  | 3016  | F-RSV gene; CR     | T | C | 3.229 |
|                  | 3506  | F-RSV gene; CR     | C | G | 1.189 |
|                  | 3551  | F-RSV gene; CR     | G | A | 98.55 |
|                  | 3846  | F-RSV gene; 3' NCR | G | A | 1.061 |
|                  | 3905  | P gene; 5' NCR     | G | T | 1.147 |
|                  | 4040  | P gene; CR         | C | A | 5.196 |
|                  | 5445  | M gene; CR         | A | C | 1.326 |
|                  | 5446  | M gene; CR         | G | A | 3.001 |
|                  | 5567  | M gene; CR         | A | G | 67.79 |
|                  | 5846  | M gene; CR         | A | C | 1.085 |
|                  | 6529  | F gene; CR         | C | T | 2.473 |
|                  | 7093  | F gene; CR         | A | G | 39.37 |
|                  | 9052  | HN gene; CR        | A | G | 1.430 |
|                  | 9177  | HN gene; CR        | T | C | 3.711 |
|                  | 9228  | HN gene; CR        | G | A | 38.44 |
|                  | 9749  | HN gene; CR        | G | T | 1.454 |
|                  | 10051 | HN gene; CR        | G | T | 3.643 |
|                  | 10106 | HN gene; CR        | T | C | 3.730 |
|                  | 10205 | HN gene; CR        | A | G | 1.077 |
|                  | 10330 | HN gene; 3' NCR    | T | C | 1.109 |
|                  | 11603 | L gene; CR         | T | C | 1.301 |
|                  | 11604 | L gene; CR         | T | C | 98.65 |
|                  | 11960 | L gene; CR         | T | G | 1.020 |
|                  | 12858 | L gene; CR         | C | A | 46.98 |
|                  | 13739 | L gene; CR         | G | A | 92.56 |
|                  | 16255 | L gene; CR         | G | T | 4.980 |

CR, coding region

NCR, noncoding region
